# PLASMID CARRIAGE AND THE UNORTHODOX USE OF FISHER'S THEOREM IN EVOLUTIONARY BIOLOGY

CARLOS REDING<sup>1,2\*</sup>

<sup>1</sup>*Department of Genetics, Stanford University, Stanford, CA 94305, USA.*

<sup>2</sup>*Faculty of Life Sciences, University of Bristol, BS2 8BH Bristol, United Kingdom.*

\*Corresponding author: [rc\\_reding@teknik.io](mailto:rc_reding@teknik.io)

**The link between fitness and reproduction rate is a central tenet in evolutionary biology: mutants reproducing faster than the dominant wild-type are favoured by selection, otherwise the mutation is lost. This link is given by Fisher's theorem under the assumption that fitness can only change through mutations. Here I show that fitness, as formalised by Fisher, changes through time without invoking new mutations—allowing the co-maintenance of fast- and slow-growing genotypes. The theorem does not account for changes in population growth that naturally occur due to resource depletion, but it is key to this unforeseen co-maintenance of growth strategies. To demonstrate that fitness is not constant, as Fisher's theorem predicates, I co-maintained a construct of *Escherichia coli* harbouring pGW155B, a non-transmissible plasmid that protects against tetracycline, in competition assays without using antibiotics. Despite growing 40% slower than its drug-sensitive counterpart, the construct with pGW155B persisted throughout the competition without tetracycline—maintaining the plasmid. Thus, predicting the selection of microbial genotypes may be more difficult than previously thought.**

## I. INTRODUCTION

Textbook population genetics [1–3] and textbook microbiology [4] define the fitness of microbial populations as the intrinsic population growth rate. This notion stems from Fisher's theorem of natural selection [5] where fitness ( $m$ ) is given by the exponential model  $N(t) = N_0 e^{mt}$ . Here  $N_0$  is the initial number of individuals of a given genotype, and  $N(t)$  the number of individuals at time  $t$ . Thus, the ratio  $W_{ij} = m_i/m_j$  gives the fitness of a mutant with respect to another ( $W_{ij}$ ). Given the simplicity of Fisher's theorem, it is widely used to study microbial evolution [6–10] and measure the fitness of microbial genotypes through fitness competition assays [6, 11–14]. If fitness is exclusively given by population growth rate, and it is an inherited trait, it is reasonable to expect that mutants with greater fitness will be represented with greater proportion in the next generation thereby replacing the wild-type genotype [1, 5].

33 However, slow growth strategies abound among microbes [15–18]. The ubiquity of  
34 plasmids, for example, cannot be explained with this paradigm given the reduction in  
35 fitness they impose [19–21]. This discrepancy can be explained by analysing Fisher’s the-  
36 orem. Fisher assumes that  $m_i/m_j$  is constant, consistently with the view that fitness is  
37 inheritable and therefore it can only change through mutations that affect  $m$  [6]. Below I  
38 show it is not, exposing conditions where slow reproducing genotypes can be maintained  
39 through time when competing against genotypes that reproduce faster. Even in the ab-  
40 sence of trade-offs between reproduction and survival [22]. Relying on my new analysis  
41 of Fisher’s theorem, I co-maintained a construct of *Escherichia coli* harbouring a non-  
42 transmissible plasmid, with a tetracycline resistance gene, in fitness competition assays  
43 without using antibiotics. The plasmid imposed a 40% reduction in growth rate with re-  
44 spect to its plasmid-free counterpart, but the bacterium kept it even without tetracycline.  
45 This, in turns, suggests that selection for plasmids, commonly studied through Fisher’s  
46 theorem, may be stronger than previously thought—explaining their ubiquity in nature.

## 47 II. RESULTS

48 Let me assume two competing genotypes, mutants A and B, that grow consistently with  
49 population genetics theory [1, 2]. The following system of ordinary differential equations  
50 describes the change in the number of individuals of each mutant over time:

$$51 \quad \frac{dA}{dt} = m_a A, \quad \frac{dB}{dt} = m_b B, \quad (1)$$

52 where  $m$  is the population growth rate increase as introduced above, and  $A(0) = B(0) = x$   
53 where  $x$  is strictly positive. Note that  $m$  is derived from random birth ( $b$ ) and death ( $d$ )  
54 rates, so that  $m = b - d$  [1], and that it is independent of the number of individuals of  
55 each genotype. Each individual is equally likely to die or reproduce at any given time,  
56 and the age distribution is near to the equilibrium so that  $b$  and  $d$  are nearly constant.  
57 The growth dynamics of both mutants is illustrated in Figure 1A. If  $b$  and  $d$  are constant,  
58  $m$  is a constant and therefore the relative fitness difference between genotypes  $W_{ba} =$   
59  $m_b/m_a = k$  is also constant. In other words, if  $m_b = \frac{\ln[B(t)/B(0)]}{t}$  as derived from the  
60 exponential model introduced above [2, 6, 23], and  $B(t)$  is the number of individuals of  
61 mutant B at an arbitrary time  $t$ , the relative fitness  $W_{ba}$  is the same regardless of  $t$ . The  
62 same applies to the fitness of A with respect to B. Indeed, if  $m_b > m_a$ , the number of  
63 mutant B individuals is higher than those of mutant A at all times as Figure 1A shows.

74 Now suppose that  $m$  depends on the number of individuals of each genotype. This is  
75 a reasonable assumption given that resources are depleted during microbial growth, and

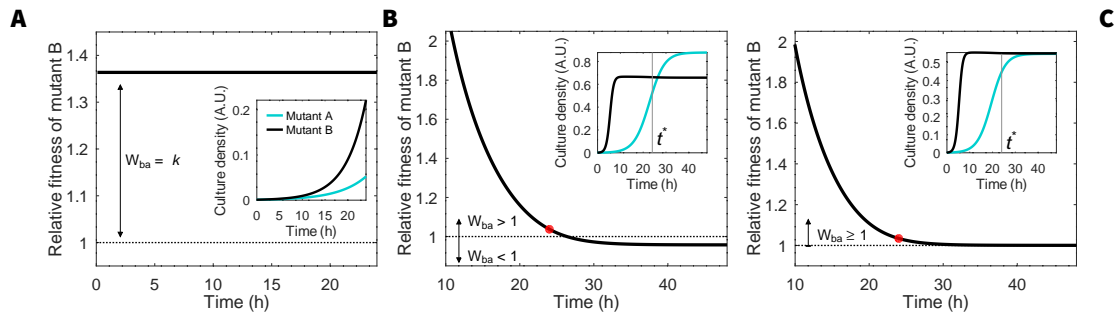

64 **Figure 1. Change in relative fitness when populations have exponential and logistic growth. A)** Change in  
 65 relative fitness of mutant B ( $W_{ba}$ , black) over time when competing mutants have density-independent, exponen-  
 66 tial growth—assumed by population genetics theory for populations with continuous growth and overlapping  
 67 generations [1, 2]. Relative fitness was calculated as [6]  $W_{ba} = m_b/m_a$ , where  $m$  corresponds to the population  
 68 growth rate for each mutant. The fitness of mutant A, reference, is shown as a black, dotted line. The inset shows  
 69 the change in cell density, in arbitrary units (A. U.), during the competition. **B-C)** The same information is shown  
 70 for mutants with density-dependent growth, with (B) and without (C) trade-off between reproduction rate and  
 71 survival. The sampling time  $t^* = 24$  hours, commonly used in microbiological assays, is noted by a red marker  
 72 in the main plot, and a vertical, grey line in the insets.

76 that resources are finite, limiting the abundance of each mutant over time:

$$77 \quad \frac{dA}{dt} = m_a \left( 1 - \frac{A}{K_a} \right) A, \quad \frac{dB}{dt} = m_b \left( 1 - \frac{B}{K_b} \right) B. \quad (2)$$

78 Here  $K_a$  and  $K_b$  are the maximal population size attainable (*carrying capacity*) for mu-  
 79 tants A and B, respectively, resulting from the limited availability of resources. Now, the  
 80 population growth rate  $m$  is corrected by the term  $1 - (N_i/K_i)$ . The Lotka-Volterra model  
 81 of competition [24] includes the term  $1 - (N_i - \alpha_{ij}N_j)/K_i$ , where  $\alpha_{ij}N_j$  is the linear reduc-  
 82 tion in growth rate—in terms of  $K$ —of species  $i$  by competing species  $j$ . But for simplicity  
 83 I assumed the interference between species is negligible and therefore  $\alpha_{ij}N_j \approx 0$ . This  
 84 formalisation describes the limitation in growth imposed by the environment, due to fi-  
 85 nite resources, reducing  $m$  and the growth of both genotypes over time (Figure 1B and C).  
 86 In this scenario,  $m_b$  depends on the carrying capacity of mutant B *and* mutant A, with the  
 87 relative fitness changing to

$$88 \quad W_{ba} = \frac{m_b \left[ 1 - \left( B/K_b \right) \right]}{m_a \left[ 1 - \left( A/K_a \right) \right]} = \frac{m_b^*}{m_a^*}. \quad (3)$$

89 In other words,  $W_{ba}$  will change through time until both mutants reach their carrying  
 90 capacities, and  $W_{ba}$  becomes the ratio of carrying capacities so  $W_{ab} = K_b/K_a = k$  is  
 91 constant. Only after this point fitness can be measured with no variation though time.  
 92 Curiously, in this scenario  $m$  is still calculated as  $m_b = \frac{\ln[B(t)/B(0)]}{t}$  [6, 11–14]. Estimating

93 fitness differences between two genotypes using equation (3), however, requires prior  
94 knowledge of the carrying capacity which can be problematic [6].

95 The result when  $m_b$  is calculated in biological populations, where their growth is lim-  
96 ited by resource availability, is illustrated in Figures 1B and C: fitness declines exponen-  
97 tially over time, and whether a mutant is more or less fit than the reference genotype will  
98 be given by the choice of  $t$ , an arbitrary period during which genotypes are allowed to grow,  
99 and therefore  $B(t)$ . Thus, depending on the combination of carrying capacities, rates of  
100 population increase, and sampling time, a mutant may be fitter, as fit, or less fit than the  
101 reference genotype.

102 If, say,  $m_b > m_a$  and  $W_{ba} > 1$ , which mutant, A or B, would be selected in pair-  
103 wise competition assays? Despite the simplicity of equations (1) and (2), the answer is  
104 not straightforward. Figure 2 illustrates the change in relative abundance of two geno-  
105 types, A, and B, growing in competition for a common resource. These genotypes are  
106 haploid, with continuous growth and overlapping generations where  $m_a$  and  $m_b$  repre-  
107 sent their population growth rates as introduced above. The competition is propagated at  
108 regular intervals  $c$  where the new initial conditions are given by  $N_a(c_{+1}, 0) = N_a(c, t^*)d$ ,  
109  $N_b(c_{+1}, 0) = N_b(c, t^*)d$ , with  $t^*$  being the time of growth allowed prior to the propaga-  
110 tion and  $0 \leq d \leq 1$  the dilution factor during the propagation step analog to experimen-  
111 tal assays [6, 7, 13]. Following population genetics theory [1, 3, 4, 6], the outcome of  
112 this competition is straightforward: if, say, mutant B reproduces faster than mutant A  
113 ( $m_b > m_a$ ), then  $W_{ab} = m_a/m_b < 1$  and mutant A goes extinct (Figure 2A). Regardless of  
114 how long the competition is allowed to progress until the next propagation step, mutant  
115 A is always lost in competition with B. Only through the emergence of a new mutant A\*  
116 with  $m_a^* > m_b > m_a$  should this prediction change.

117 But when fitness changes through time the outcome of the competition becomes un-  
118 clear, now depending on whether the competing genotypes reach their carrying capaci-  
119 ties before the propagation: if the competition is propagated very frequently, so that *both*  
120 genotypes are in active growth, the genotype reproducing faster will replace that repro-  
121 ducing slower consistently with Fisher's theorem. However, if one or both genotypes are  
122 allowed to reach their carrying capacities, both will be co-maintained regardless of the  
123 in rates of population increase (Figures 2B and C). Here the relative frequency will be  
124 given by their carrying capacities  $K$ , so if reproduction and carrying capacity engage in a  
125 trade-off [22] for one genotype, this will be most frequent (Figure 2B).

132 To test this prediction, I competed two constructs of *Escherichia coli* MC4100, Wyl  
133 and GB(c) (see Methods), and measured their variation in fitness through time. Figure  
134 3A shows that both constructs reach their carrying capacities within 24 hours. The con-  
135 struct GB(c) carries the non-transmissible plasmid pGW155B [25] harbouring *tet(36)*—a

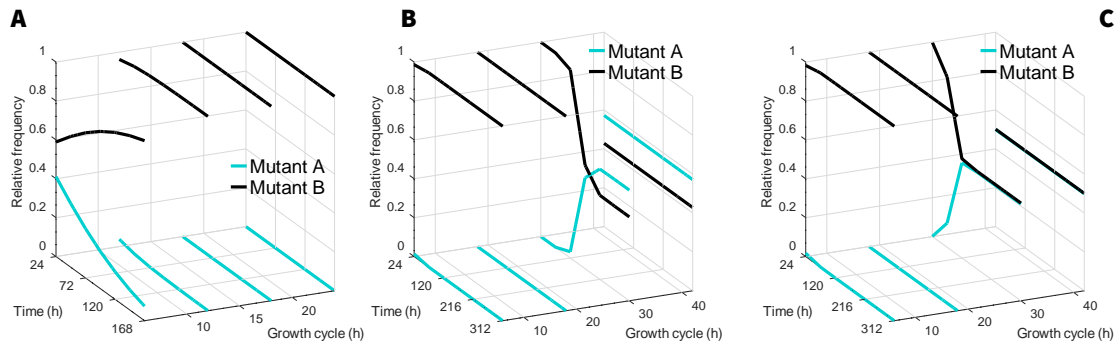

126 **Figure 2. Change in relative frequency during competition depending on the length of the growth cycle.**

127 Changes in frequency over time for mutants A (cyan) and B (black) following propagations at arbitrary times  
128  $t=6h$ ,  $t=12h$ ,  $t=18h$ , and  $t=24h$ . These times correspond to different stages of growth as Figure 1 shows. Each  
129 plot illustrate the case for genotypes with density-independent growth (A), or density-dependent growth where  
130 a genotype does not engage in a trade-off between reproduction and survival (B) and when it does not (C).

136 ribosome-protection type resistance gene against tetracycline [25]. This plasmid lacks a  
137 *rep* gene to control tightly the partition of plasmids after cell division [26–28] (addgene  
138 vector database accession #2853). While pGW155B is a synthetic plasmid, many natural  
139 plasmids also lack partition systems [28, 29]. Both constructs have identical chromo-  
140 some with exception of this plasmid, and the fluorescence gene they carry: cyan (*cfp*,  
141 GB(c)) or yellow (*yfp*, Wyl), to allow their identification in competition assays. Using a  
142 non-transmissible plasmid prevents cross-contamination by horizontal gene transfer be-  
143 tween the resistant construct GB(c) and Wyl. Importantly, the use of constructs derived  
144 from MC4100 avoids interactions between competitors that may affect the outcome of  
145 the competition for reasons beyond pGW155B, like the production of bacteriocins [30].

157 pGW155B penalised the population growth rate of construct GB(c) by approximately  
158 40% compared to Wyl (Figure 3B) as I found out using pure cultures. The duration of lag,  
159 and carrying capacity were also sensitive to plasmid carriage, regardless of whether I mea-  
160 sured the growth using fluorescence or light scattering (Figure S1). Changes in cell size  
161 could confound optical density and fluorescence readings, but this phenomenon leaves a  
162 signature [31] in growth data that is absent in my dataset (Figures S1, S2, and S3). The  
163 change in carrying capacity  $K$  can be linked to an increase in biomass yield ( $y$ ) as Monod’s  
164 expression [32]  $y = K/S$  suggests, where  $S$  the supply of glucose. This metric is consis-  
165 tent the data, given that construct GB(c) has to express and translate plasmid-borne genes  
166 with the same supply of glucose (Figures 3B and C). This means that pGW155B triggers  
167 a metabolic trade-off between growth rate and biomass yield redolent of rK-selection the-  
168 ory[22, 33].

180 For the competition assay, I mixed equal proportions (cell/cell) of two pure cultures,

6

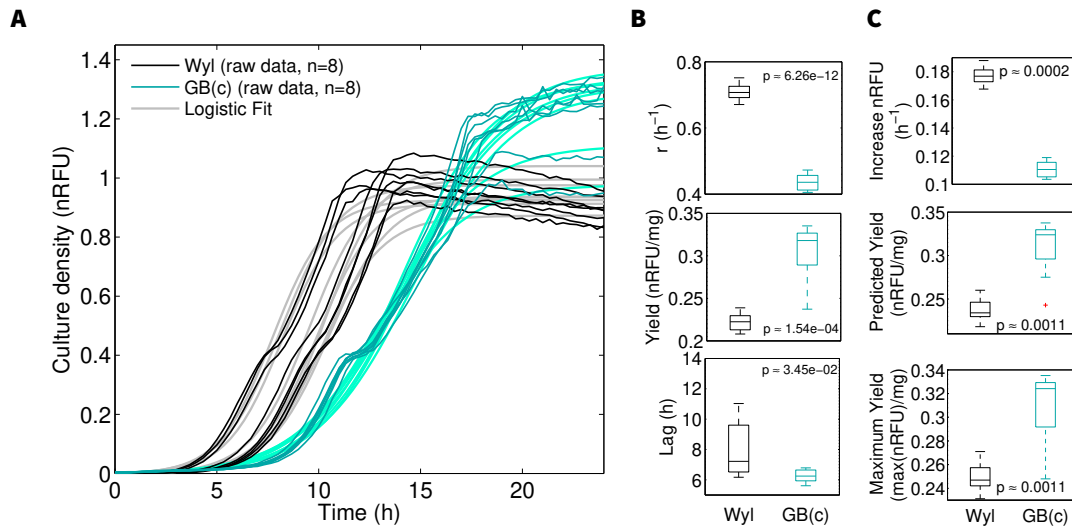

146 **Figure 3. Asymmetric carriage costs of pGW155B.** **A**) Overlapped growth curves of constructs Wyl (black) and  
147 GB(c) (cyan) in the absence of tetracycline over 24h. I estimated the maximum growth rate ( $r$ ), population size  
148 in the equilibrium ( $K$ ), biomass yield, and lag duration from a 4-parameter logistic model fitted to growth data  
149 (see Methods). Data fits for constructs Wyl and GB(c) are shown in grey and light cyan, respectively. **B**) Box plots  
150 showing the median (centre of the box), 25th and 75th percentile for each of the aforementioned parameters.  
151 The whiskers extend to the most extreme data points that are not outliers, and these are individually represented.  
152 The  $p$  value shown refers to a Two-sample  $t$ -test with unequal variance (8 replicates) that I used to test differences  
153 in the parameters between both constructs. **C**) Alternative metrics for growth rate and biomass yield: forward  
154 Euler approximation (top), data fit predicted yield (middle), and maximal yield across all time points in growth  
155 data (bottom). The  $p$  values correspond to Two-sample  $t$ -tests with unequal variance (8 replicates).

181 from construct GB(c) and Wyl respectively, grown overnight, in media containing no an-  
182 tibiotic or 0.04  $\mu\text{g/mL}$  of tetracycline (see Methods). I incubated the mixed culture at  
183 30°C until both constructs reached their carrying capacity ( $K$ ,  $\sim 24\text{h}$  as per data in Fig-  
184 ure 3A), and then I propagated the competition into a new plate containing fresh media.  
185 I repeated the propagation step seven times totalling between 77 (GB(c)) and 119 (Wyl)  
186 generations. Indeed, the relative fitness of both constructs changed through time. In  
187 the presence of tetracycline the relative fitness of drug-sensitive construct Wyl was be-  
188 low GB(c), which harbours pGW155B, at all times as Figure 4A illustrates. This meant  
189 that GB(c) increased its relative frequency in following propagation steps and became  
190 the most abundant construct throughout the competition (Figure 4B). During the com-  
191 petition, the number of copies of pGW155B harboured by GB(c) increased 5- to 6-fold  
192 driven by exposure to tetracycline (2-sample  $t$ -test with unequal variances,  $p=0.0088$ ,  
193  $df=2.5826$ ,  $t$ -statistic= $-7.2441$ ; with 3 replicates. Figure 4C) as it would be reasonable to  
194 expect given the exposure to tetracycline. However, Wyl never goes extinct consistently  
195 with Figure 2—note the model does not implement mutations events likely to occur in



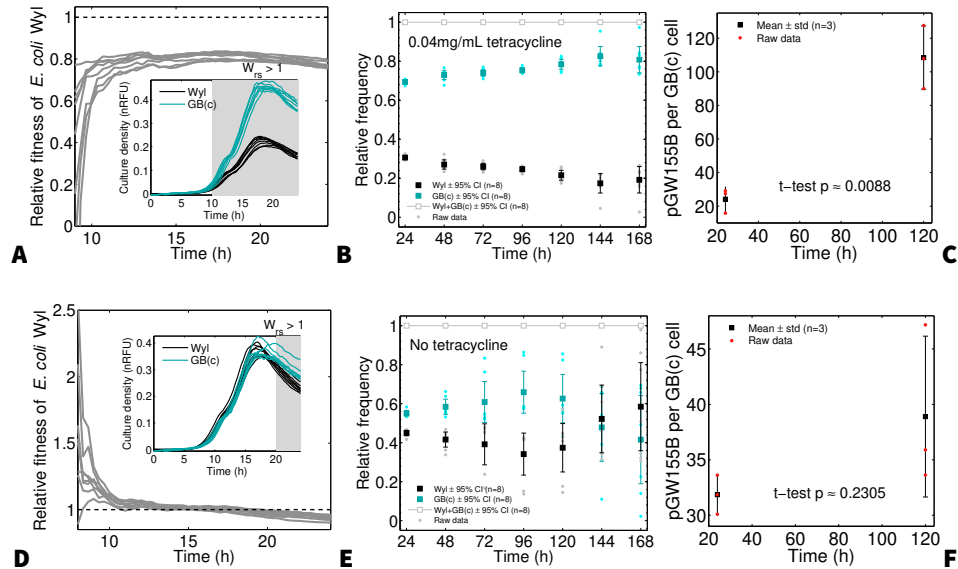

169 **Figure 4. Time-dependent fitness data allows co-maintenance of both constructs without tetracycline.**  
170 Relative fitness during first 24 hour pairwise-competition of construct Wyl, where both constructs grew in media  
171 supplemented with 0.04  $\mu\text{g}/\text{mL}$  of tetracycline (**A**) and without drug (**D**). Fitness for each replicate is presented  
172 with respect to the reference GB(c) (black dashed line). The inset illustrate the growth curves for both constructs,  
173 highlighting in grey the period where the relative fitness of Wyl ( $W_{sr}$ ) is lower than its tetracycline-resistant competitor's. (**B**) and (**E**) show the change in relative frequency of both constructs through time when both constructs  
174 grew in media supplemented with tetracycline (**B**) and without antibiotic (**E**). Error bars represent the mean  $\pm$   
175 95% confidence intervals, with raw data points shown as dots. (**C**) and (**F**) show the change in relative copy numbers of pGW155B borne by construct GB(c) during the pairwise-competition, calculated using quantitative PCR  
176 (see Methods). Error bars represent the mean  $\pm$  standard deviation, with raw data shown in red.  
178

196 *vitro*.

197 Similarly, when both constructs grew in mixed cultures without tetracycline expo-  
198 sure, the relative fitness of Wyl can be higher, equal, or lower than construct GB(c) through  
199 time as Figure 4D shows. This meant that both constructs were co-maintained, and  
200 with similar relative frequencies, despite the difference in growth rate (Figure 4E). In  
201 other words, pGW155B persisted despite the lack of tetracycline and the difference in  
202 growth rates with no substantial variation in the number of plasmids harboured per cell  
203 (2-sample *t*-test with unequal variances,  $p=0.2305$ ,  $df=2.2351$ ,  $t$ -statistic=-1.6353; with  
204 3 replicates. Figure 4F). This contrasts with previous studies [13] showing the rapid de-  
205 cline, within a similar time frame, in bacteria harbouring non-transmissible plasmids.

### III. DISCUSSION

207 Experimentalists rely extensively on Fisher's theorem to study whether mutations are  
208 beneficial or deleterious. The misconception in Fisher's theorem highlighted in this study  
209 is mathematically simple, but the result contests a basic tenet in evolutionary biology: re-  
210 production is not all that matters. Indeed, data show that prokaryotes that slow grow are  
211 just as abundant as those growing substantially faster [18, 34]. This is what predictions  
212 in Figures 2B and C suggest. If the frequency of selection is low, caused for example  
213 by long periods of extreme starvation [35, 36], slow- and fast-growing genotypes can be  
214 co-maintained. This is particularly relevant to understand the abundance of plasmids,  
215 difficult to understand Fisher's rationale [21].

216 It is noteworthy to separate the phenomenon described in this manuscript from rK-  
217 selection theory [33]. This theory postulates that selection cannot simultaneously op-  
218 timise the growth rate and population size and therefore that they engage in a trade-off.  
219 Here I postulate that fitness shifts from reproduction to carrying capacity as populations  
220 grow, not necessarily in evolutionary timescales. Thus, when selection occurs will de-  
221 termine whether fast- or slow-growing will be favoured. Thus, while pGW155B indeed  
222 triggers a trade-off redolent of rK-selection, the theoretical predictions Figures 1C and 2C  
223 as well as the data highlight that rK trade-offs have no effect on the predicted co-existence  
224 of competing genotypes. In this new light, for example, the costs of plasmid carriage be-  
225 come relative of the frequency of selection. Conditions of high frequency, say, caused  
226 by repeated exposure to antibiotics during therapies, could indeed favour genotypes with  
227 higher growth rates. But the rationale needs not apply when selection is less frequent,  
228 where both growth strategies can be co-maintained—explaining the abundance of plas-  
229 mids in nature despite the growth penalty they impose on their hosts.

### IV. METHODS

231 **Media and Strains.** I used the strains of *Escherichia coli* GB(c) and Wyl [37] (a gift from  
232 Remy Chait and Roy Kishony), and M9 minimal media supplemented with 0.4% glucose  
233 and 0.1% casamino acids (w/v). I made tetracycline stock solutions from powder stock  
234 (Duchefa, Ref. #0150.0025) at 5mg/mL in 50% ethanol, filter sterilised, and stored at  
235  $-20^{\circ}\text{C}$ . Subsequent dilutions were made from this stock in supplemented M9 minimal  
236 media and kept at  $4^{\circ}\text{C}$ .

237 **Batch transfer protocol.** I inoculated a 96-well microtitre plate containing 150  $\mu\text{g}/\text{mL}$   
238 of supplemented M9 media with a mixture of two overnight cultures, one of *E. coli* GB(c)



239 and another of *E. coli* Wyl (1 $\mu$ L containing approx.  $2 \cdot 10^8$  cells, Figure S2). The overnight  
240 culture for GB(c) was supplemented with 100ng/mL of tetracycline to preserve the plas-  
241 mid pGW155B carrying *tet(36)* as described elsewhere [7], then centrifuged and removed  
242 prior adding to the microtitre plate. I incubated the plate at 30°C in a commercial spec-  
243 trophotometer and measured the optical density of each well at 600nm (OD<sub>600</sub>), yellow  
244 fluorescence for the Wyl strain (YFP excitation at 505nm, emission at 540nm), and cyan  
245 fluorescence for the GB(c) strain (CFP at 430nm/480nm) every 20min for 24h. After  
246 each day I transferred 1.5 $\mu$ L of each well, using a 96-well pin replicator, into a new mi-  
247 crotitre plate containing fresh growth medium and tetracycline.

248 **Growth parameter estimation.** Yellow and cyan fluorescence protein genes were con-  
249 stitutively expressed given the constant ratio between fluorescence and optical density  
250 (Figure S4). This allowed me to use fluorescence data as a proxy for cell density in mixed  
251 culture conditions. I normalised fluorescence readings using a conversion factor,  $n_f$ , cal-  
252 culated by growing each construct in a range of glucose concentrations, and regressing  
253 the linear model  $\text{RFU} = n_f \cdot \text{OD} + c$ , where RFU is relative fluorescence units data, OD  
254 optical density data,  $n_f$  the conversion factor between fluorescence and optical density,  
255 and  $c$  the crossing point with the  $y$ -axis when  $\text{OD} = 0$ . I imported the resulting time series  
256 data set (Figures S3) into MATLAB R2014b to subtract background and calculate fitness as  
257 described in the main text.

258 **DNA material extraction.** For each concentration, I sampled three representative 150  
259  $\mu$ g/mL replicates that I divided in two groups: for chromosome and plasmid DNA extrac-  
260 tion. I used ‘GeneJet DNA’ (ThermoScientific, Ref. #K0729) and ‘GeneJet Plasmid’  
261 (ThermoScientific, Ref. #K0502) extraction kits to extract chromosomal and plasmid  
262 DNA (pDNA) from the samples, respectively, and used Qubit to quantify DNA and pDNA  
263 yields. Both extracts were diluted accordingly in extraction buffer, as per in manufacturer  
264 instructions, to normalise DNA across samples.

265 **Quantitative PCR and plasmid copy number estimation.** I used primer3 to design two  
266 pairs of primers with melting temperature ( $T_m$ ) of 60°C and non-overlapping probes with  
267  $T_m$  of 70°C. The amplicon ranges between 100 to 141bp depending on the locus (Table 1).  
268 Two reaction mixes were prepared using the kit ‘Luminaris Color Probe Low ROX’ (Ther-  
269 moScientific, Ref. #K0342), adding 0.3 $\mu$ M of each primer and 0.2 $\mu$ M of the probe as per  
270 manufacturer specifications. Following a calibration curve for each reaction (Figure S5)  
271 I added 0.01ng of chromosomal or plasmid DNA material to each of the reaction mixes.

272 **Table 1.** Primers and probes designed using Primer3. Amplicon ranging from 100 to 141bp.  $T_m$  indicates the  
273 estimated melting temperature.

| Target gen      | Sequence (5' → 3')   | $T_m$ (°C) | Feature |
|-----------------|----------------------|------------|---------|
| 275 <i>tatB</i> | CGATGAAGCGTTCCTACGTT | 60.27      | Forward |
|                 | TCATGCGCAGCTTCATTATC | 59.94      | Reverse |
|                 | AAGGCGAGCGATGAAGCGCA | 70.70      | Probe   |
| <i>tet(36)</i>  | ATTGGGCATCTATTGGCTTG | 59.22      | Forward |
|                 | CCGATTCACAGGCTTCTTG  | 60.76      | Reverse |
|                 | AGCCTTTGCCAATTGGGGCG | 70.37      | Probe   |

276 To estimate the relative copies of pGW155B per GB(c) cell, I calculated the corre-  
277 sponding proportion of chromosomal DNA corresponding to the GB(c)-type from data in  
278 Figure 4 and used the expression [13]

$$279 \quad cn = \frac{(1 + E_c)^{C_{tc}}}{(1 + E_p)^{C_{tp}}} \times \frac{S_c}{S_p},$$

280 where  $cn$  is the number of plasmid copies per chromosome,  $S_c$  and  $S_p$  are the size of the  
281 chromosome and pGW155B amplicon in bp,  $E_c$  and  $E_p$  the efficiency of the qPCR taken  
282 from data in Figure S5, and  $C_{tc}$  and  $C_{tp}$  are the cycles at which I first detected product  
283 amplification ( $C_t$ ).

## 284 REFERENCES

- 285 1. Crow, J. F., Kimura, M., *et al.* *An introduction to population genetics theory.* (New  
286 York, Evanston and London: Harper & Row, Publishers, 1970).
- 287 2. Nagylaki, T. in *Introduction to Theoretical Population Genetics* 5–27 (Springer, 1992).
- 288 3. Templeton, A. *Population Genetics and Microevolutionary Theory* ISBN: 9780471409519  
289 (Wiley, 2006).
- 290 4. Dawes, I. & Sutherland, I. *Microbial Physiology* ISBN: 9780632024636 (Wiley,  
291 1992).
- 292 5. Fisher, R. A. *The Genetical Theory of Natural Selection* 308–315 (At The Clarendon  
293 Press, 1930).
- 294 6. Lenski, R. E., Rose, M. R., Simpson, S. C. & Tadler, S. C. Long-Term Experimental  
295 Evolution in *Escherichia coli*. I. Adaptation and Divergence During 2,000 Genera-  
296 tions. *Am. Nat.* **138**, pp. 1315–1341 (1991).

- 297 7. Chait, R., Craney, A & Kishony, R. Antibiotic interactions that select against resis-  
298 tance. *Nature* **446**, 668–671 (2007).
- 299 8. Wang, H., Avican, K., Fahlgren, A., *et al.* Increased plasmid copy number is essen-  
300 tial for *Yersinia* T3SS function and virulence. *Science* **353**, 492–495 (2016).
- 301 9. Adkar, B. V., Manhart, M., Bhattacharyya, S., Tian, J., Musharbash, M. & Shakhnovich,  
302 E. I. Optimization of lag phase shapes the evolution of a bacterial enzyme. *Nat. Ecol.*  
303 *Evol.* **1**, 1–6 (2017).
- 304 10. Concepción-Acevedo, J., Weiss, H. N., Chaudhry, W. N. & Levin, B. R. Malthusian  
305 parameters as estimators of the fitness of microbes: a cautionary tale about the low  
306 side of high throughput. *PLoS One* **10**, e0126915 (2015).
- 307 11. Andersson, D. I. & Levin, B. R. The biological cost of antibiotic resistance. *Curr.*  
308 *Opin. Microbiol.* **2**, 489–493 (1999).
- 309 12. Gullberg, E., Cao, S., Berg, O. G., *et al.* Selection of resistant bacteria at very low  
310 antibiotic concentrations. *PLoS Pathog.* **7**, e1002158 (July 2011).
- 311 13. Millán, A. S., Peña-Miller, R., Toll-Riera, M., *et al.* Positive selection and compen-  
312 satory adaptation interact to stabilize non-transmissible plasmids. *Nat. Commun.*  
313 **5** (2014).
- 314 14. Ram, Y., Dellus-Gur, E., Bibi, M., *et al.* Predicting microbial growth in a mixed  
315 culture from growth curve data. *Proc. Natl. Acad. Sci. U.S.A.* **116**, 14698–14707  
316 (2019).
- 317 15. Kussell, E., Kishony, R., Balaban, N. Q. & Leibler, S. Bacterial persistence: a model  
318 of survival in changing environments. *Genetics* **169**, 1807–1814 (2005).
- 319 16. Pedrós-Alió, C. Marine microbial diversity: can it be determined? *Trends Microbiol.*  
320 **14**, 257–263 (2006).
- 321 17. Lever, M. A., Rogers, K. L., Lloyd, K. G., *et al.* Life under extreme energy limitation:  
322 a synthesis of laboratory- and field-based investigations. *FEMS Microbiol. Revs.* **39**,  
323 688–728 (2015).
- 324 18. Flemming, H.-C. & Wuertz, S. Bacteria and archaea on Earth and their abundance  
325 in biofilms. *Nat. Rev. Microbiol.* **17**, 247–260 (2019).
- 326 19. Smillie, C., Garcillán-Barcia, M. P., Francia, M. V., Rocha, E. P. & de la Cruz, F.  
327 Mobility of plasmids. *Microbiol. Mol. Biol. Rev.* **74**, 434–452 (2010).
- 328 20. Harrison, E. & Brockhurst, M. A. Plasmid-mediated horizontal gene transfer is a  
329 coevolutionary process. *Trends Microbiol.* **20**, 262–267 (2012).

- 330 21. Probing the plasmid paradox. *Nat. Ecol. Evol.* **5**, 1559–1559 (2021).
- 331 22. Reding-Roman, C., Hewlett, M., Duxbury, S., Gori, F., Gudelj, I. & Beardmore,  
332 R. The unconstrained evolution of fast and efficient antibiotic-resistant bacterial  
333 genomes. *Nat. Ecol. Evol.* **1**, 0050 (2017).
- 334 23. Hansen, S. K., Rainey, P. B., Haagenzen, J. A. & Molin, S. Evolution of species  
335 interactions in a biofilm community. *Nature* **445**, 533–536 (2007).
- 336 24. Gilpin, M. E. & Ayala, F. J. Global models of growth and competition. *Proc. Natl.*  
337 *Acad. Sci. U.S.A.* **70**, 3590–3593 (1973).
- 338 25. Whittle, G, Whitehead, T. R., Hamburger, N, Shoemaker, N. B., Cotta, M. A., *et al.*  
339 Identification of a new ribosomal protection type of tetracycline resistance gene,  
340 tet(36), from swine manure pits. *Appl. Environ. Microbiol.* **64**, 4151–4158 (2003).
- 341 26. Del Solar, G. & Espinosa, M. Plasmid copy number control: an ever-growing story.  
342 *Mol. Microbiol* **37**, 492–500 (2000).
- 343 27. Garcillán-Barcia, M. P., Alvarado, A. & de la Cruz, F. Identification of bacterial plas-  
344 mids based on mobility and plasmid population biology. *FEMS Microbiol. Rev.* **35**,  
345 936–956 (2011).
- 346 28. Million-Weaver, S. & Camps, M. Mechanisms of plasmid segregation: have multi-  
347 copy plasmids been overlooked? *Plasmid* **75**, 27–36 (2014).
- 348 29. Guynet, C. & de la Cruz, F. Plasmid segregation without partition. *Mob. Genet. Ele-*  
349 *ments* **1**, 236–241 (2011).
- 350 30. Dobson, A., Cotter, P. D., Ross, R. P. & Hill, C. Bacteriocin Production: a Probiotic  
351 Trait? *Appl. Environ. Microbiol.* **78**, 1–6 (2012).
- 352 31. Stevenson, K., McVey, A. F., Clark, I. B., Swain, P. S. & Pilizota, T. General cali-  
353 bration of microbial growth in microplate readers. *Sci. Rep.* **6**, 1–7 (2016).
- 354 32. Monod, J. *Recherches sur la croissance des cultures bactériennes* PhD thesis (Paris,  
355 1941).
- 356 33. Reznick, D., Bryant, M. J. & Bashey, F. r-and K-selection revisited: the role of pop-  
357 ulation regulation in life-history evolution. *Ecology* **83**, 1509–1520 (2002).
- 358 34. Ernebjerg, M. & Kishony, R. Distinct growth strategies of soil bacteria as revealed  
359 by large-scale colony tracking. *Appl. Environ. Microbiol.* **78**, 1345–1352 (2012).
- 360 35. Gray, D. A., Dugar, G., Gamba, P., Strahl, H., Jonker, M. J. & Hamoen, L. W. Ex-  
361 treme slow growth as alternative strategy to survive deep starvation in bacteria.  
362 *Nat. Commun.* **10**, 1–12 (2019).

- 363 36. Shoemaker, W. R., Jones, S. E., Muscarella, M. E., Behringer, M. G., Lehmkuhl,  
364 B. K. & Lennon, J. T. Microbial population dynamics and evolutionary outcomes  
365 under extreme energy limitation. *Proc. Natl. Acad. Sci. U.S.A.* **118**, e2101691118  
366 (2021).
- 367 37. Chait, R., Shrestha, S., Shah, A. K., Michel, J.-B. & Kishony, R. A Differential  
368 Drug Screen for Compounds That Select Against Antibiotic Resistance. *PLoS One*  
369 **5**, e15179 (2010).

370 **Competing interests.** The author declares no competing interests.

371 **Acknowledgements.** The author thanks Robert Beardmore for laboratory support in the  
372 early states of this study.

14

373

## I. SUPPLEMENTARY FIGURES

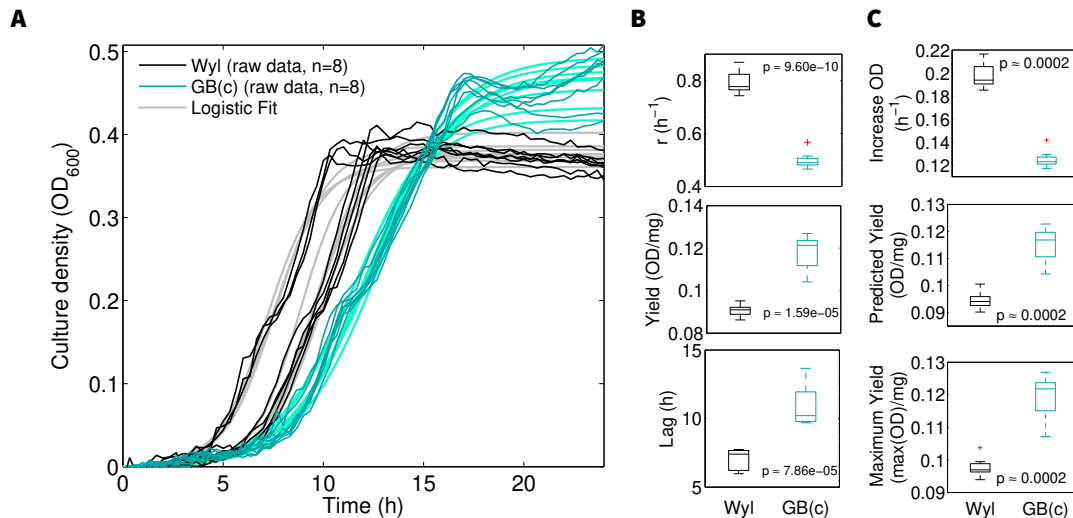

374 **Figure S1. Asymmetric carriage costs of pGW155B (optical density data).** **A**) Overlapped growth curves  
375 of constructs Wyl (black) and GB(c) (cyan) in the absence of tetracycline over 24h. I estimated the maximum  
376 growth rate ( $r$ ), population size in the equilibrium ( $K$ ), biomass yield, and lag duration from a 4-parameter logistic  
377 model fitted to growth data (see Methods). Data fits for constructs Wyl and GB(c) are shown in grey and light  
378 cyan, respectively. **B**) Box plots showing the median (centre of the box), 25th and 75th percentile for each of  
379 the aforementioned parameters. The whiskers extend to the most extreme data points that are not outliers, and  
380 these are individually represented. The  $p$  value shown refers to Two-sample  $t$ -tests with unequal variance (8  
381 replicates) that I used to test differences in the parameters between both constructs. **C**) Alternative metrics for  
382 growth rate and biomass yield: forward Euler approximation (top), data fit predicted yield (middle), and maximal  
383 yield across all time points (bottom). The  $p$  values correspond to Two-sample  $t$ -tests with unequal variance (8  
384 replicates).



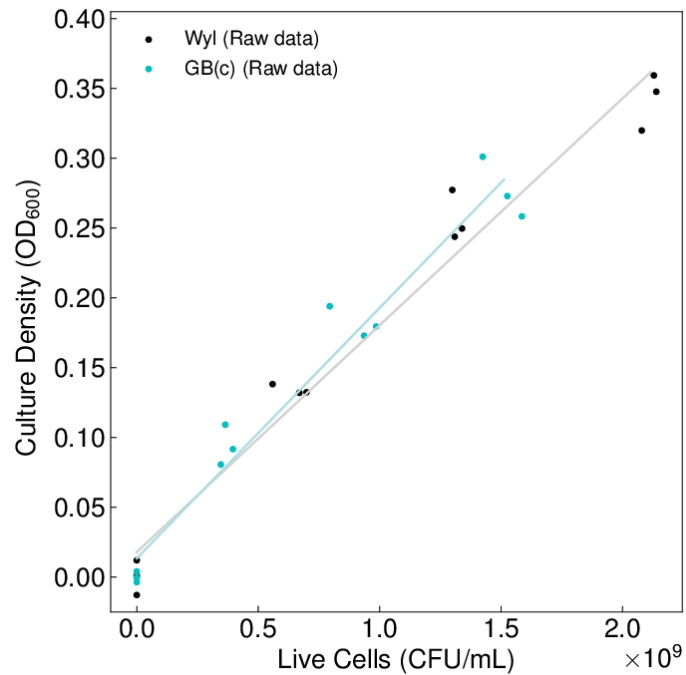

386 **Figure S2. Calibration curve to translate optical density data to number of *Escherichia coli* cells.** I fitted  
387 the linear model  $a = bx + c$  to optical density and colony counting data (dots) to calculate the number of optical  
388 density units (OD<sub>600</sub>) per cell.  $a$  denotes the optical density readings measured at 600nm,  $c$  the crossing point  
389 with the  $y$ -axis when  $x = 0$ , and  $b$  the conversion factor between optical density and number of cells ( $x$ ). I  
390 interpolating optical density readings to calculate the number of cells within a culture as  $x = (a - c)/b$ . For  
391 the strain Wyl,  $b = 1.62 \times 10^{-10} \text{ OD} \cdot \text{mL} \cdot \text{CFU}^{-1}$  and  $c = 1.78 \times 10^{-2} \text{ OD}$ , whereas for GB(c)  $b = 1.79 \times$   
392  $10^{-10} \text{ OD} \cdot \text{mL} \cdot \text{CFU}^{-1}$  and  $c = 1.33 \times 10^{-2} \text{ OD}$ .

16

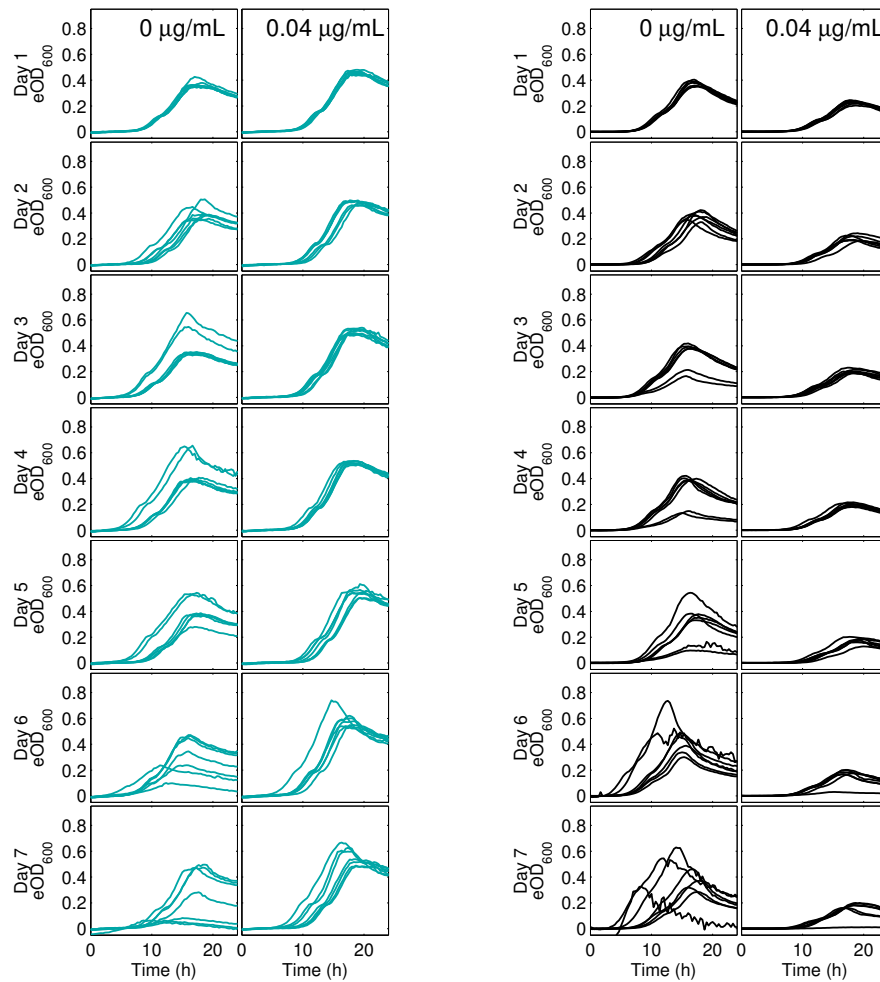

394 **Figure S3. Raw data of each construct during the competition.** Raw optical density data for GB(c) (cyan) and  
 395 Wyl (black), measured every 20 min and converted from fluorescence readings. Each individual plot represents  
 396 the change in abundance of each construct over 24 hours. Data corresponding to each condition, with and with-  
 397 out tetracycline, are aggregated as columns.

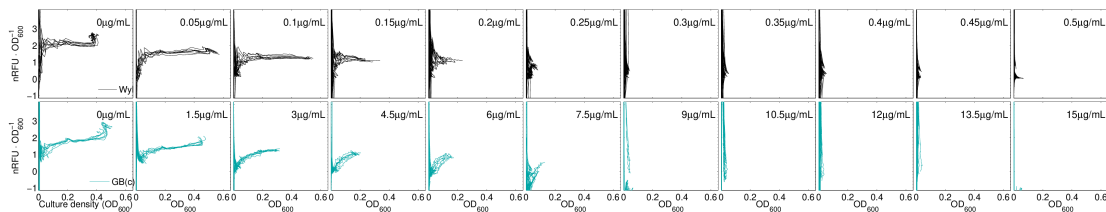

399 **Figure S4. Changes in relative fluorescence over time in GB(c) and Wyl strains in pure culture conditions.**  
 400 Raw change in fluorescence, per optical density units, measured every 20min for 24h for the Wyl- (black) and GB(c)-  
 401 type. Each column represents the data set for each tetracycline concentration used.

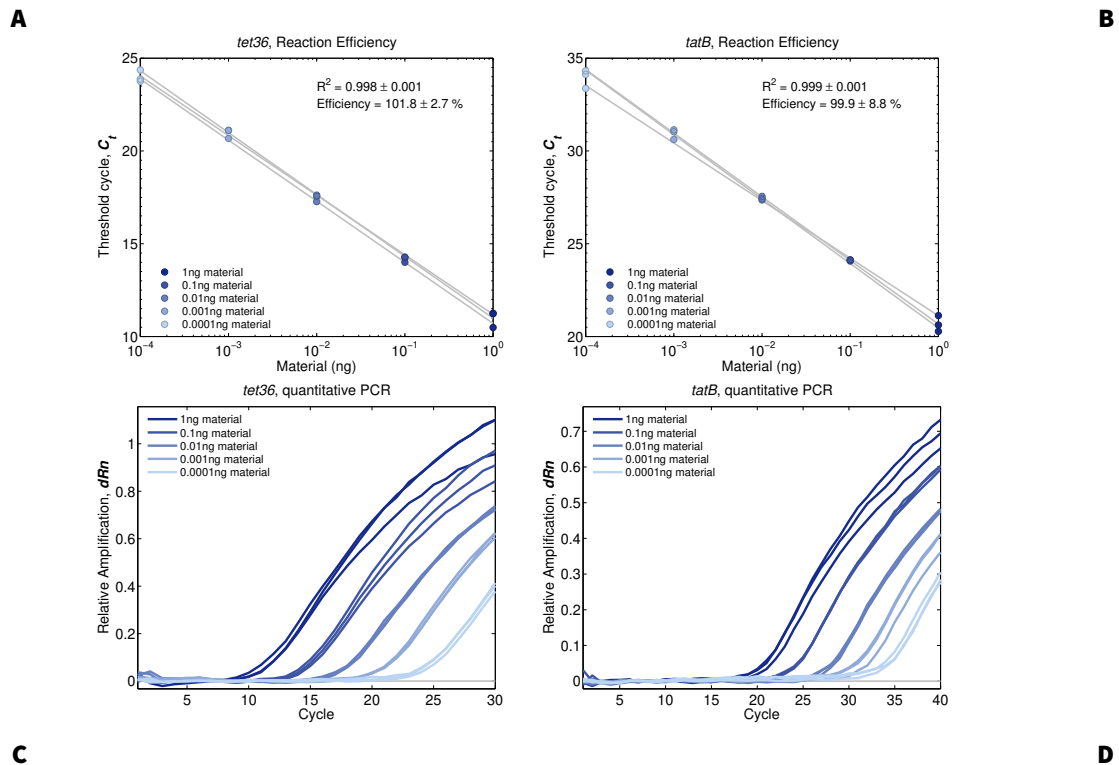

403 **Figure S5. Quantitative PCR calibration curves for *tet(36)* and *tatB*.** Reaction efficiency for the set of primers  
404 and probes, listed in Table 1 the main Methods section, for *tet(36)* (A) and *tatB*. The efficiency was calculated as  
405  $E_f = 10^{-1/Slope} - 1$ , and the slope term calculated by fitting a linear model to qPCR threshold cycle ( $C_t$ ) data.  
406 The mean  $\pm$  standard deviation for the adjusted coefficient of determination  $R^2$  and efficiency are shown in the  
407 figures. The amplification curves for each reaction, using 3 replicates, are shown in C) and D), respectively.
